# Supplementary material for: Facile hydrothermal synthesis and luminescent properties of Eu-doped CaF2–YF3alkaline-earth ternary fluoride microspheres
Source: Royal Society of Chemistry journal article supplement (doi:10.1039/c4ra04185b), 2014-08-07
Supplement: c4ra04185b1.pdf [file c4ra04185b1.pdf]

**Electronic Supplementary Information (ESI)**

Facile Hydrothermal Synthesis and Luminescent  
Properties of Eu-Doped  $\text{CaF}_2\text{-YF}_3$  Alkaline-Earth  
Ternary Fluoride Microspheres

***Yang Zhang,<sup>ab</sup> Qi Zhao,<sup>a</sup> Baiqi Shao,<sup>a</sup> Wei Lü,<sup>a</sup> Xiangting Dong<sup>b</sup> and Hongpeng You<sup>\*a</sup>***

*<sup>a</sup> State Key Laboratory of Rare Earth Resource utilization, Changchun*

*Institute of Applied Chemistry, Chinese Academy of Sciences, Changchun*

*130022, P. R. China. E-mail: hpyou@ciac.ac.cn.*

*<sup>b</sup> College of Chemistry and Environment Engineering, Changchun*

*University of Science and Technology, Changchun 130022, China.*

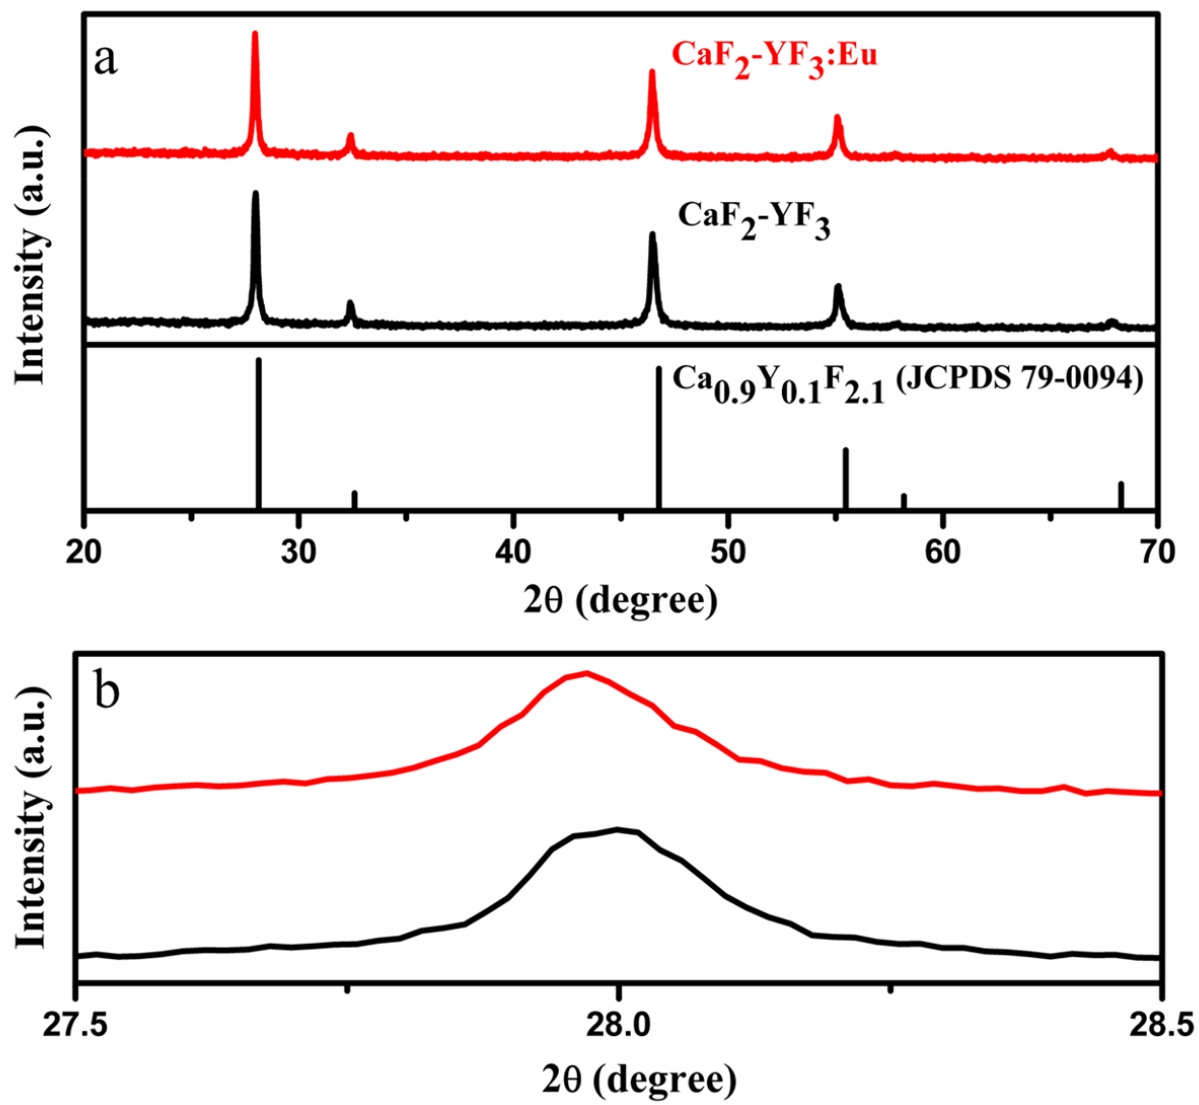

**Figure S1** (a) The XRD patterns of  $\text{CaF}_2\text{-YF}_3$  (black line) and Eu-doped  $\text{CaF}_2\text{-YF}_3$  (red line), and (b) their corresponding partial enlarged detail.

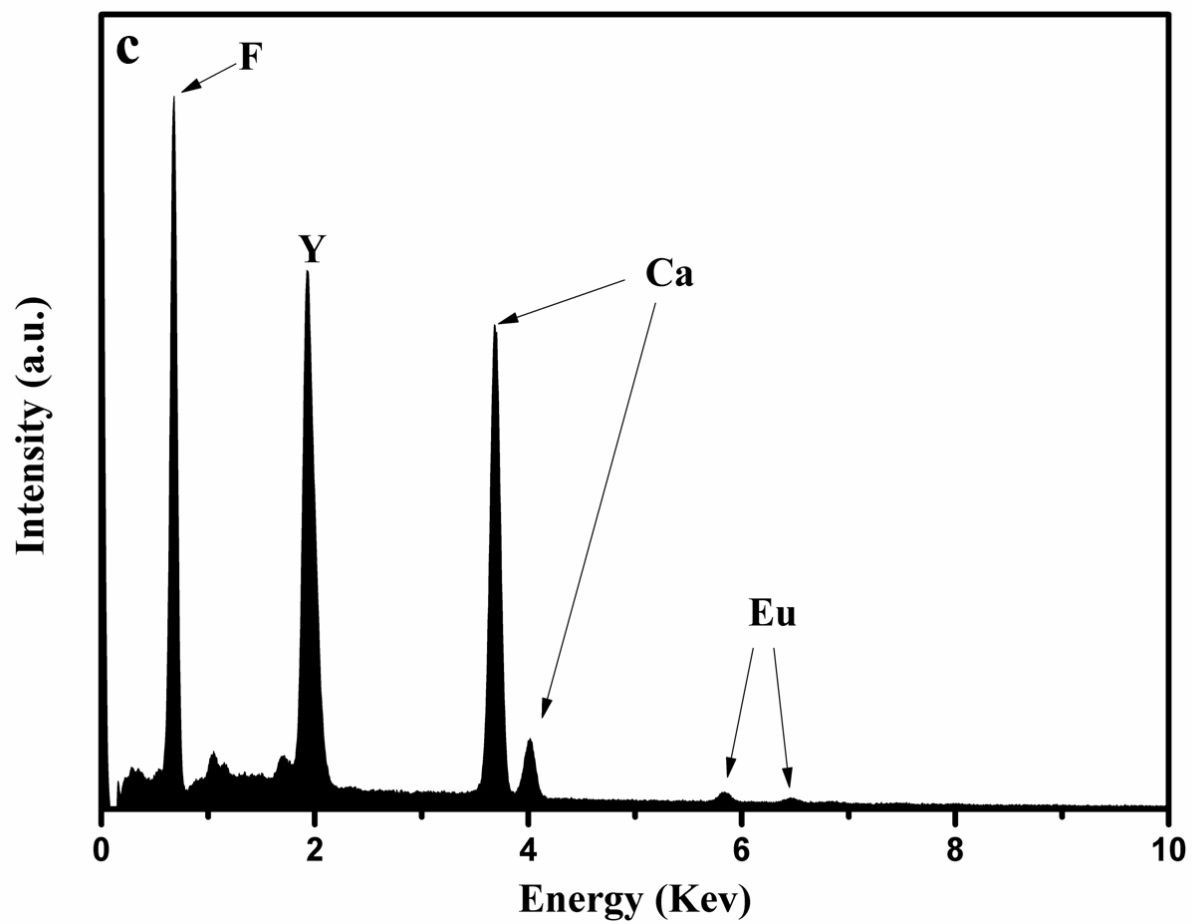

**Figure S2** The EDX spectrum of Eu-doped  $\text{CaF}_2\text{-YF}_3$ .
